# Supplementary material for: A Peptide-Based Erythropoietin-Receptor Agonist for Pure Red-Cell Aplasia
Source: Atypon-hosted journal article supplement (doi:10.1056/nejmoa074037), 2009-11-04
Supplement: nejm_macdougall_1848sa1.pdf [file nejm_macdougall_1848sa1.pdf]

## Supplementary Appendix

This appendix has been provided by the authors to give readers additional information about their work.

Supplement to: Macdougall IC, Rossert J, Casadevall N, et al. A peptide-based erythropoietin-receptor agonist for pure red-cell aplasia. *N Engl J Med* 2009;361:1848-55.

**Supplementary Table 1: Demographics and Baseline Characteristics**

| <b>Pt #<br/>(Country)</b> | <b>Age<br/>Gender</b> | <b>Prior ESA<br/>Exposure</b>       | <b>Year of<br/>PRCA<br/>Diagnosis</b> | <b>Prior<br/>Immunosuppressive<br/>Treatment for<br/>PRCA</b>                   | <b>Pre-<br/>treatment<br/>Red Cell<br/>Transfusions<br/>(units/3mo<br/>prior to<br/>Hematide)</b> | <b>Pre-<br/>treatment<br/>Hemoglobin<br/>(g/dL)</b> | <b>Pre-<br/>treatment<br/>Reticulocyte<br/>Count<br/>(<math>\times 10^9/L</math>)</b> |
|---------------------------|-----------------------|-------------------------------------|---------------------------------------|---------------------------------------------------------------------------------|---------------------------------------------------------------------------------------------------|-----------------------------------------------------|---------------------------------------------------------------------------------------|
| 1<br>(GE)                 | 52<br>F               | Epoetin alfa,<br>Epoetin beta       | 2000                                  | Steroids, IVIG,<br>Cyclophosphamide,<br>Cyclosporine, anti-<br>CD-20 antibodies | 6                                                                                                 | 10.3                                                | 1.9                                                                                   |
| 2<br>(GE)                 | 72<br>M               | Epoetin beta                        | 2005                                  | None                                                                            | 10                                                                                                | 10.6                                                | 37.8                                                                                  |
| 3<br>(GE)                 | 54<br>M               | Epoetin beta                        | 2006                                  | None                                                                            | 0                                                                                                 | 9.8                                                 | 39.7                                                                                  |
| 4<br>(GE)                 | 64<br>F               | Epoetin alfa<br>Epoetin beta        | 2001,<br>2006                         | Steroids,<br>Azathioprine, IVIG                                                 | 1                                                                                                 | 8.0                                                 | 21.5                                                                                  |
| 5<br>(GE)                 | 91<br>M               | Darbepoetin<br>alfa                 | 2005                                  | Steroids                                                                        | 8                                                                                                 | 8.0                                                 | 19.3                                                                                  |
| 6<br>(GE)                 | 80<br>M               | Epoetin<br>beta                     | 2008                                  | Cyclosporine                                                                    | 10                                                                                                | 9.9                                                 | 2.6                                                                                   |
| 7<br>(FR)                 | 72<br>M               | Epoetin alfa<br>Epoetin beta        | 2005                                  | Cyclosporine                                                                    | 8                                                                                                 | 8.2                                                 | 70.0*                                                                                 |
| 8<br>(FR)                 | 77<br>F               | Epoetin alfa<br>Epoetin beta        | 2003,<br>2006                         | Cyclosporine                                                                    | 12                                                                                                | 9.7                                                 | 21.1 <sup>†</sup>                                                                     |
| 9<br>(FR)                 | 88<br>M               | Epoetin beta                        | 2007                                  | None                                                                            | 0                                                                                                 | 11.1 <sup>§</sup>                                   | 35.0 <sup>§</sup>                                                                     |
| 10<br>(FR)                | 63<br>F               | Epoetin beta<br>Darbepoetin<br>alfa | 2008                                  | None                                                                            | 9                                                                                                 | 8.1                                                 | 11.0                                                                                  |
| 11<br>(UK)                | 38<br>M               | Darbepoetin<br>alfa                 | 2006                                  | None                                                                            | 4                                                                                                 | 8.1                                                 | 2.0                                                                                   |
| 12<br>(UK)                | 60<br>M               | Epoetin alfa<br>Darbepoetin<br>alfa | 2002                                  | Cyclosporine                                                                    | 27                                                                                                | 8.2                                                 | 1.8                                                                                   |

|            |         |                     |      |      |    |      |      |
|------------|---------|---------------------|------|------|----|------|------|
| 13<br>(UK) | 79<br>M | Epoetin beta        | 2007 | None | 6  | 7.5  | 28.3 |
| 14<br>(UK) | 81<br>F | Darbepoetin<br>alfa | 2007 | None | 12 | 10.2 | 8.5  |

\*Patient 7 received monthly red cell transfusions prior to the study; reticulocyte counts were as low as  $2.2 \times 10^9/L$  during the 4 months prior to study enrollment. The baseline value reported here was obtained from a blood sample collected approximately 1 month following a transfusion; the result was high relative to the patient's history.

†The baseline reticulocyte count for Patient 8 reflects a value obtained 1 week after the first Hematide injection; a true baseline value (prior to treatment) was not available.

§At the time of diagnosis, Patient 9 had a hemoglobin value of 6.7 g/dL and a reticulocyte count of  $9.5 \times 10^9/L$ .

**Supplementary Table 2: Adverse Events Reported from April 2006 through March 2009**

| System Organ Class<br>Preferred Term                            | No. of Patients      |                                        |                           |
|-----------------------------------------------------------------|----------------------|----------------------------------------|---------------------------|
|                                                                 | Any Adverse<br>Event | Grade 3 or<br>Higher Adverse<br>Event* | Serious Adverse<br>Event† |
| <b>Blood and Lymphatic System Disorders</b>                     |                      |                                        |                           |
| Anemia                                                          | 2                    | 1‡                                     | 1‡                        |
| Eosinophilia                                                    | 1                    |                                        |                           |
| Leukocytosis                                                    | 1                    |                                        |                           |
| Leukopenia                                                      | 1                    |                                        | 1§                        |
| Lymphadenopathy mediastinal                                     | 1                    |                                        |                           |
| Neutropenia                                                     | 1                    |                                        |                           |
| Pancytopenia                                                    | 1                    |                                        |                           |
| White blood cell count decreased                                | 1                    |                                        |                           |
| <b>Cardiac Disorders</b>                                        |                      |                                        |                           |
| Atrial fibrillation                                             | 1                    | 1                                      | 1                         |
| Atrial flutter                                                  | 1                    |                                        | 1¶                        |
| Bradycardia                                                     | 1                    |                                        |                           |
| Cardiac arrest                                                  | 1                    | 1                                      | 1                         |
| Endocarditis                                                    | 1                    | 1**                                    | 1**                       |
| Palpitations                                                    | 1                    |                                        |                           |
| <b>Ear and Labyrinth Disorders</b>                              |                      |                                        |                           |
| Deafness                                                        | 1                    |                                        |                           |
| Tinnitus                                                        | 2                    | 1††                                    |                           |
| <b>Endocrine Disorders</b>                                      |                      |                                        |                           |
| Thyroid cyst                                                    | 1                    |                                        |                           |
| <b>Eye Disorders</b>                                            |                      |                                        |                           |
| Conjunctival haemorrhage                                        | 1                    |                                        |                           |
| Eyelid oedema                                                   | 1                    |                                        |                           |
| Optic neuropathy                                                | 1                    |                                        | 1**                       |
| Presbyopia                                                      | 1                    |                                        |                           |
| <b>Gastrointestinal Disorders</b>                               |                      |                                        |                           |
| Abdominal pain                                                  | 1                    |                                        |                           |
| Constipation                                                    | 1                    |                                        |                           |
| Diarrhoea                                                       | 3                    |                                        |                           |
| Dyspepsia                                                       | 1                    |                                        |                           |
| Nausea                                                          | 1                    |                                        |                           |
| Rectal haemorrhage                                              | 1                    |                                        |                           |
| Vomiting                                                        | 1                    |                                        |                           |
| <b>General Disorders and Administration Site<br/>Conditions</b> |                      |                                        |                           |
| Asthenia                                                        | 4                    |                                        |                           |
| Catheter site cellulitis                                        | 1                    |                                        |                           |
| Chills                                                          | 1                    |                                        |                           |
| Drug ineffective                                                | 1                    | 1‡                                     | 1‡                        |
| Fatigue                                                         | 5                    | 1§                                     |                           |
| Influenza like illness                                          | 1                    |                                        |                           |
| Injection site haematoma                                        | 1                    |                                        |                           |
| Injection site joint pain                                       | 1                    | 1††                                    |                           |

| System Organ Class<br>Preferred Term                      | No. of Patients      |                                        |                           |
|-----------------------------------------------------------|----------------------|----------------------------------------|---------------------------|
|                                                           | Any Adverse<br>Event | Grade 3 or<br>Higher Adverse<br>Event* | Serious Adverse<br>Event† |
| Injection site pruritus                                   | 1                    |                                        |                           |
| Oedema                                                    | 1                    |                                        |                           |
| Oedema peripheral                                         | 3                    |                                        |                           |
| Pyrexia                                                   | 2                    |                                        |                           |
| <b>Immune System Disorders</b>                            |                      |                                        |                           |
| Milk allergy                                              | 1                    |                                        |                           |
| Seasonal allergy                                          | 1                    |                                        |                           |
| Transplant rejection                                      | 1                    |                                        |                           |
| <b>Infections and Infestations</b>                        |                      |                                        |                           |
| Cytomegalovirus infection                                 | 1                    |                                        | 1 <sup>§</sup>            |
| Escherichia bacteraemia                                   | 1                    |                                        | 1 <sup>§</sup>            |
| Escherichia urinary tract infection                       | 1                    |                                        |                           |
| Gangrene                                                  | 1                    | 1 <sup>‡‡</sup>                        | 1 <sup>‡‡</sup>           |
| Influenza                                                 | 1                    |                                        |                           |
| Lower respiratory tract infection                         | 1                    |                                        |                           |
| Nasopharyngitis                                           | 7                    |                                        |                           |
| Peritoneal tuberculosis                                   | 1                    | 1 <sup>§§</sup>                        | 1 <sup>§§</sup>           |
| Pneumocystis jiroveci pneumonia                           | 1                    |                                        | 1 <sup>§</sup>            |
| Rhinitis                                                  | 1                    |                                        |                           |
| Sepsis                                                    | 1                    |                                        |                           |
| Staphylococcal infection                                  | 2                    |                                        |                           |
| Tooth Abscess                                             | 1                    |                                        |                           |
| Tuberculosis                                              | 1                    | 1 <sup>§§</sup>                        | 1 <sup>§§</sup>           |
| Upper respiratory tract infections                        | 3                    |                                        |                           |
| Urinary tract infection                                   | 1                    |                                        |                           |
| <b>Injury, Poisoning and Procedural<br/>Complications</b> |                      |                                        |                           |
| Contusion                                                 | 1                    |                                        |                           |
| Fall                                                      | 1                    |                                        |                           |
| Forearm fracture                                          | 1                    |                                        |                           |
| Haemodialysis-induced symptom                             | 2                    |                                        |                           |
| Hand fracture                                             | 1                    |                                        |                           |
| Post-traumatic pain                                       | 1                    |                                        |                           |
| Procedural hypotension                                    | 2                    |                                        |                           |
| Scratch                                                   | 1                    |                                        |                           |
| Vascular pseudoaneurysm                                   | 1                    | 1 <sup>§§</sup>                        | 1 <sup>§§</sup>           |
| Wound                                                     | 1                    |                                        |                           |
| <b>Investigations</b>                                     |                      |                                        |                           |
| Biopsy kidney                                             | 1                    |                                        |                           |
| Blood creatinine increased                                | 1                    |                                        |                           |
| Blood glucose increased                                   | 1                    |                                        |                           |
| Blood oestrogen decreased                                 | 1                    |                                        |                           |
| Blood phosphorus increased                                | 1                    |                                        |                           |
| Blood potassium increased                                 | 1                    |                                        |                           |
| Blood pressure increased                                  | 2                    |                                        |                           |
| Body temperature increased                                | 1                    |                                        |                           |

| System Organ Class<br>Preferred Term                | No. of Patients      |                                        |                                       |
|-----------------------------------------------------|----------------------|----------------------------------------|---------------------------------------|
|                                                     | Any Adverse<br>Event | Grade 3 or<br>Higher Adverse<br>Event* | Serious Adverse<br>Event <sup>†</sup> |
| Cardiac murmur                                      | 1                    |                                        |                                       |
| Haemoglobin decreased                               | 5                    |                                        |                                       |
| Liver function test abnormal                        | 1                    |                                        |                                       |
| Platelet count decreased                            | 1                    |                                        |                                       |
| Reticulocyte count decreased                        | 2                    |                                        |                                       |
| Serum ferritin decreased                            | 1                    |                                        |                                       |
| Serum ferritin increased                            | 1                    |                                        |                                       |
| Weight decreased                                    | 1                    |                                        |                                       |
| Metabolism and Nutrition Disorders                  |                      |                                        |                                       |
| Abnormal loss of weight                             | 1                    |                                        |                                       |
| Anorexia                                            | 1                    |                                        |                                       |
| Diabetes mellitus                                   | 1                    |                                        |                                       |
| Fluid retention                                     | 1                    |                                        |                                       |
| Hypoglycaemia                                       | 1                    |                                        |                                       |
| Hyponatraemia                                       | 1                    |                                        |                                       |
| Musculoskeletal and Connective Tissue Disorders     |                      |                                        |                                       |
| Arthralgia                                          | 3                    |                                        |                                       |
| Arthritis                                           | 1                    |                                        |                                       |
| Intervertebral disc protrusion                      | 1                    |                                        |                                       |
| Joint swelling                                      | 1                    |                                        |                                       |
| Muscle spasms                                       | 1                    |                                        |                                       |
| Musculoskeletal pain                                | 1                    |                                        |                                       |
| Pain in extremity                                   | 1                    |                                        |                                       |
| Musculoskeletal and Connective Tissue Disorders NEC |                      |                                        |                                       |
| Back pain                                           | 1                    |                                        |                                       |
| Nervous System Disorders                            |                      |                                        |                                       |
| Confusional state                                   | 1                    | 1 <sup>  </sup>                        | 1 <sup>  </sup>                       |
| Dizziness                                           | 1                    |                                        |                                       |
| Headache                                            | 1                    | 1 <sup>††</sup>                        |                                       |
| Insomnia                                            | 1                    |                                        |                                       |
| Migraine                                            | 1                    |                                        |                                       |
| Restless legs syndrome                              | 1                    |                                        |                                       |
| Sciatica                                            | 1                    |                                        |                                       |
| Somnolence                                          | 1                    |                                        |                                       |
| Psychiatric Disorders                               |                      |                                        |                                       |
| Sleep disorder                                      | 1                    |                                        |                                       |
| Renal and Urinary Disorders                         |                      |                                        |                                       |
| Nephropathy                                         | 1                    |                                        | 1 <sup>§</sup>                        |
| Reproductive System and Breast Disorders            |                      |                                        |                                       |
| Hydrocele                                           | 1                    |                                        |                                       |
| Respiratory, Thoracic and Mediastinal Disorders     |                      |                                        |                                       |
| Aspiration                                          | 1                    |                                        |                                       |

| System Organ Class<br>Preferred Term   | No. of Patients      |                                        |                                       |
|----------------------------------------|----------------------|----------------------------------------|---------------------------------------|
|                                        | Any Adverse<br>Event | Grade 3 or<br>Higher Adverse<br>Event* | Serious Adverse<br>Event <sup>†</sup> |
| Bronchial obstruction                  | 1                    |                                        |                                       |
| Bronchitis                             | 3                    |                                        |                                       |
| Cough                                  | 2                    |                                        |                                       |
| Dyspnoea                               | 3                    |                                        |                                       |
| Nasal congestion                       | 1                    |                                        |                                       |
| Pleural effusion                       | 2                    |                                        |                                       |
| Productive cough                       | 1                    |                                        |                                       |
| Pulmonary oedema                       | 1                    | 1 <sup>§§</sup>                        | 1 <sup>§§</sup>                       |
| Skin and Subcutaneous Tissue Disorders |                      |                                        |                                       |
| Alopecia                               | 1                    |                                        |                                       |
| Eczema                                 | 2                    |                                        |                                       |
| Excoriation                            | 1                    |                                        |                                       |
| Pruritus                               | 1                    |                                        |                                       |
| Surgical and Medical Procedures        |                      |                                        |                                       |
| Arteriovenous shunt operation          | 1                    |                                        | 1 <sup>**</sup>                       |
| Cataract operation                     | 1                    |                                        |                                       |
| Catheter removal                       | 1                    |                                        |                                       |
| Catheter placement                     | 1                    |                                        |                                       |
| Central venous catheterization         | 1                    |                                        |                                       |
| Dupuytren's contracture operation      | 1                    | 1 <sup>  </sup>                        |                                       |
| Gastrointestinal tube insertion        | 1                    |                                        |                                       |
| High frequency ablation                | 1                    |                                        | 1 <sup>¶</sup>                        |
| Renal transplant                       | 1                    |                                        |                                       |
| Tooth extraction                       | 1                    |                                        |                                       |
| Ureteral stent removal                 | 1                    |                                        |                                       |
| Vascular Disorders                     |                      |                                        |                                       |
| Femoral artery aneurysm                | 1                    | 1 <sup>¶</sup>                         | 1 <sup>¶</sup>                        |
| Hypertension                           | 5                    |                                        |                                       |
| Hypotension                            | 1                    |                                        |                                       |
| Temporal arteritis                     | 1                    | 1 <sup>**</sup>                        |                                       |

\*Adverse events were Grade 3 unless otherwise noted.

<sup>†</sup>A serious adverse event is defined by the Food and Drug Administration as any untoward medical occurrence that resulted in death, was life-threatening, required in-patient hospitalization or prolonged an existing hospitalization, resulted in persistent or significant disability/incapacity, resulted in a congenital anomaly/birth defect, or required intervention to prevent one or more of these outcomes (FDA Guidance for Industry, Clinical Safety Data Management: Definitions and Standards for Expedited Reporting; ICH-E2A, March 1995).

<sup>‡</sup>Patient #10 had anemia with a lack of response to study drug, both considered medically important, requiring intervention.

<sup>§</sup>Patient #12 was hospitalized four times within 6 months: the first time for cytomegalovirus and nephropathy, a second time for leukopenia, a third time for Pneumocystis jiroveci pneumonia and bacteraemia, and a fourth time for reactivation of cytomegalovirus.

<sup>||</sup>Patient #8 was hospitalized once for atrial fibrillation and Grade 4 confusional state (vascular dementia). Approximately one year later, the patient died at home (cardiac arrest) approximately 4 months after the last dose of Hematide.

<sup>¶</sup>Patient #7 was hospitalized on separate occasions for atrial flutter, a high frequency ablation, and a femoral artery aneurysm.

<sup>\*\*</sup>Patient #5 was hospitalized on two separate occasions: once for an arteriovenous shunt operation and a second time for optic ischemic neuropathy and temporal arteritis. Prior to the hospitalizations, the patient had endocarditis, which was considered medically important, requiring intervention.

<sup>††</sup>Patient #1 had three Grade 3 adverse events (tinnitus, bone pain, and headache), none were serious.

<sup>‡‡</sup>Patient #2 was hospitalized for Grade 4 gangrene.

<sup>§§</sup>Patient #11 was hospitalized on two separate occasions: once for tuberculosis and a second time for peritoneal tuberculosis. During the second hospitalization, vascular pseudoaneurysm and pulmonary oedema were diagnosed; these latter events prolonged the existing hospitalization.

## Supplementary Figure 1

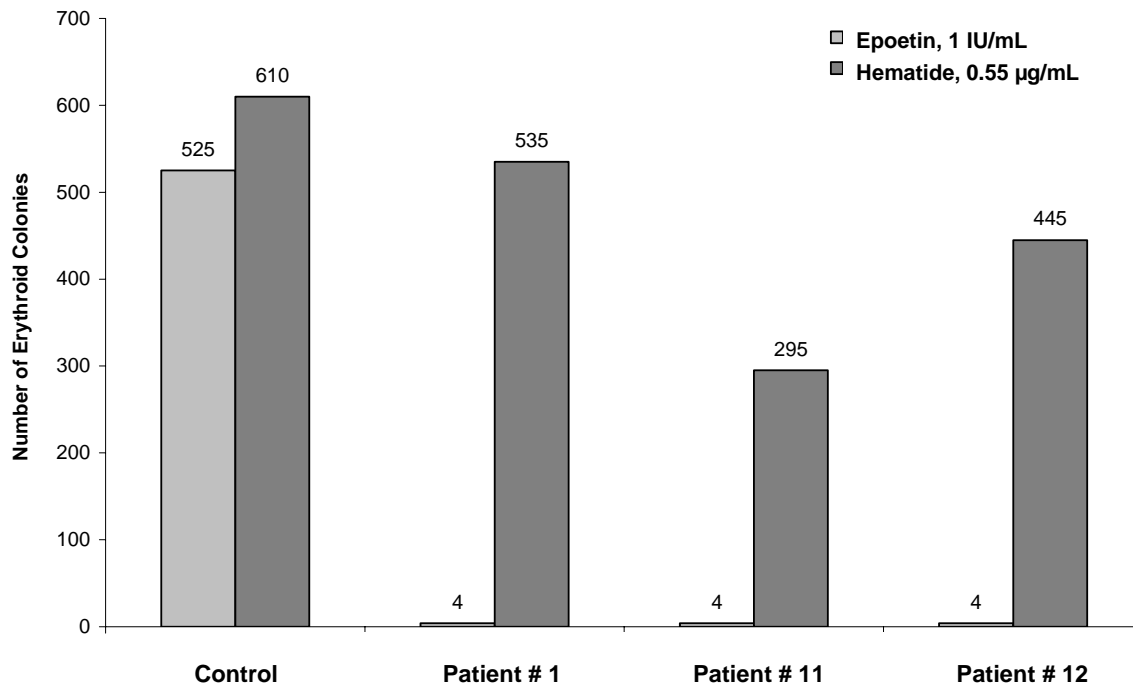

### **In vitro bone marrow culture of erythroid colonies in the presence of epoetin or Hematide.**

Results in three patients in this study show marked inhibition of CFU-E growth in the presence of the patients' serum containing anti-erythropoietin antibodies, compared with control serum. This inhibition could, however, be overcome by the addition of 0.55 µg/mL of Hematide to the culture medium. Light gray bars represent the number of in vitro erythroid colonies with control or patient serum in the presence of erythropoietin. Dark gray bars represent the number of in vitro erythroid colonies with control or patient serum in the presence of Hematide.
